# Supplementary material for: Association of Japanese and Mediterranean Dietary Patterns with Muscle Weakness in Japanese Community-Dwelling Middle-Aged and Older Adults: Post Hoc Cross-Sectional Analysis
Source: MDPI journal article supplement (doi:10.3390/ijerph191912636), 2022-10-03
Supplement: s1 [file s1]

**Supplemental table S1.** Characteristics of sex discrimination in the rJDI12 score quartile range

| Characteristics                        | Male       |            |            |            |          | Female     |            |            |            |          |
|----------------------------------------|------------|------------|------------|------------|----------|------------|------------|------------|------------|----------|
|                                        | Q1         | Q2         | Q3         | Q4         | <i>P</i> | Q1         | Q2         | Q3         | Q4         | <i>P</i> |
| <b>Range of scores</b>                 | 0–4        | 5–6        | 7–8        | 9–12       |          | 0–4        | 5–6        | 7–8        | 9–12       |          |
| <b>Participants, n</b>                 | 746        | 705        | 782        | 565        |          | 835        | 801        | 892        | 705        |          |
| <b>Age, years</b>                      | 61.6 (6.9) | 62.3 (6.9) | 63.4 (7.0) | 64.5 (6.7) | <0.001   | 61.1 (7.0) | 62.3 (7.1) | 63.5 (7.0) | 64.5 (6.6) | <0.001   |
| <b>BMI, kg/m2</b>                      | 23.4 (3.0) | 23.6 (3.0) | 23.6 (2.8) | 23.3 (2.7) | 0.432    | 23.0 (3.5) | 22.7 (3.2) | 22.9 (3.2) | 22.7 (3.1) | 0.216    |
| <b>Cerebrovascular diseases, n (%)</b> |            |            |            |            | 0.461    |            |            |            |            | 0.069    |
| - Yes                                  | 27 (3.6)   | 28 (4.0)   | 24 (3.1)   | 26 (4.6)   |          | 22 (2.6)   | 12 (1.5)   | 16 (1.8)   | 16 (2.3)   |          |
| - No                                   | 476 (63.8) | 443 (62.8) | 512 (65.5) | 378 (66.9) |          | 486 (58.2) | 486 (60.7) | 570 (63.9) | 455 (64.5) |          |
| - Missing                              | 243 (32.6) | 234 (33.2) | 246 (31.5) | 161 (28.5) |          | 327 (39.2) | 303 (37.8) | 306 (34.3) | 234 (33.2) |          |
| <b>Coronary heart diseases, n (%)</b>  |            |            |            |            | 0.123    |            |            |            |            | 0.166    |
| - Yes                                  | 81 (10.9)  | 65 (9.2)   | 89 (11.4)  | 81 (14.3)  |          | 66 (7.9)   | 61 (7.6)   | 80 (9.0)   | 56 (7.9)   |          |
| - No                                   | 422 (56.6) | 406 (57.6) | 447 (57.2) | 323 (57.2) |          | 442 (52.9) | 437 (54.6) | 506 (56.7) | 415 (58.9) |          |
| - Missing                              | 243 (32.6) | 234 (33.2) | 246 (31.5) | 161 (28.5) |          | 327 (39.2) | 303 (37.8) | 306 (34.3) | 234 (33.2) |          |
| <b>Diabetes, n (%)</b>                 |            |            |            |            | 0.032    |            |            |            |            | 0.004    |
| - Yes                                  | 74 (9.9)   | 101 (14.3) | 104 (13.3) | 89 (15.8)  |          | 69 (8.3)   | 61 (7.6)   | 56 (6.3)   | 36 (5.1)   |          |
| - No                                   | 429 (57.5) | 370 (52.5) | 432 (55.2) | 315 (55.8) |          | 440 (52.7) | 437 (54.6) | 530 (59.4) | 435 (61.7) |          |
| - Missing                              | 243 (32.6) | 234 (33.2) | 246 (31.5) | 161 (28.5) |          | 326 (39.0) | 303 (37.8) | 306 (34.3) | 234 (33.2) |          |
| <b>Cancer, n (%)</b>                   |            |            |            |            | 0.488    |            |            |            |            | 0.166    |
| - Yes                                  | 27 (3.6)   | 29 (4.1)   | 36 (4.6)   | 30 (5.3)   |          | 38 (4.6)   | 39 (4.9)   | 44 (4.9)   | 30 (4.3)   |          |
| - No                                   | 476 (63.8) | 442 (62.7) | 500 (63.9) | 374 (66.2) |          | 470 (56.3) | 459 (57.3) | 542 (60.8) | 441 (62.6) |          |

|                            |                |                |                |                |        |                |                |                |                |        |
|----------------------------|----------------|----------------|----------------|----------------|--------|----------------|----------------|----------------|----------------|--------|
| - Missing                  | 243 (32.6)     | 234 (33.2)     | 246 (31.5)     | 161 (28.5)     |        | 327 (39.2)     | 303 (37.8)     | 306 (34.3)     | 234 (33.2)     |        |
| Smoking status, n (%)      |                |                |                |                | <0.001 |                |                |                |                | <0.001 |
| - Current                  | 288 (38.6)     | 253 (35.9)     | 206 (26.3)     | 151 (26.7)     |        | 110 (13.2)     | 88 (11.0)      | 67 (7.5)       | 35 (5.0)       |        |
| - Former                   | 297 (39.8)     | 282 (40.0)     | 381 (48.7)     | 279 (49.4)     |        | 79 (9.5)       | 61 (7.6)       | 58 (6.5)       | 37 (5.2)       |        |
| - Never                    | 143 (19.2)     | 152 (21.6)     | 178 (22.8)     | 122 (21.6)     |        | 620 (74.3)     | 632 (78.9)     | 744 (83.4)     | 616 (87.4)     |        |
| - Missing                  | 18 (2.4)       | 18 (2.6)       | 17 (2.2)       | 13 (2.3)       |        | 26 (3.1)       | 20 (2.5)       | 23 (2.6)       | 17 (2.4)       |        |
| Alcohol consumption, n (%) |                |                |                |                | 0.213  |                |                |                |                | 0.735  |
| - Every day                | 271 (36.3)     | 271 (38.4)     | 305 (39.0)     | 186 (32.9)     |        | 75 (9.0)       | 63 (7.9)       | 79 (8.9)       | 46 (6.5)       |        |
| - Sometimes                | 274 (36.7)     | 264 (37.4)     | 279 (35.7)     | 245 (43.4)     |        | 264 (31.6)     | 249 (31.1)     | 285 (32.0)     | 231 (32.8)     |        |
| - Never                    | 186 (24.9)     | 157 (22.3)     | 181 (23.1)     | 121 (21.4)     |        | 459 (55.0)     | 452 (56.4)     | 485 (54.4)     | 387 (54.9)     |        |
| - Missing                  | 15 (2.0)       | 13 (1.8)       | 17 (2.2)       | 13 (2.3)       |        | 37 (4.4)       | 37 (4.6)       | 43 (4.8)       | 41 (5.8)       |        |
| Time spent walking, n (%)  |                |                |                |                | <0.001 |                |                |                |                | <0.001 |
| - ≥1 h/d                   | 263 (35.3)     | 286 (40.6)     | 357 (45.7)     | 262 (46.4)     |        | 308 (36.9)     | 332 (41.4)     | 396 (44.4)     | 331 (47.0)     |        |
| - 0.5-1 h/d                | 258 (34.6)     | 253 (35.9)     | 263 (33.6)     | 193 (34.2)     |        | 310 (37.1)     | 305 (38.1)     | 338 (37.9)     | 250 (35.5)     |        |
| - <0.5 h/d                 | 198 (26.5)     | 151 (21.4)     | 141 (18.0)     | 99 (17.5)      |        | 199 (23.8)     | 155 (19.4)     | 149 (16.7)     | 113 (16.0)     |        |
| - Missing                  | 27 (3.6)       | 15 (2.1)       | 21 (2.7)       | 11 (1.9)       |        | 18 (2.2)       | 9 (1.1)        | 9 (1.0)        | 11 (1.6)       |        |
| TMIG-IC score, points      | 5 (5–5)        | 5 (5–5)        | 5 (5–5)        | 5 (5–5)        | 0.164  | 5 (5–5)        | 5 (5–5)        | 5 (5–5)        | 5 (5–5)        | 0.036  |
| Energy, kcal/d             | 1584.3 (481.8) | 1942.3 (498.5) | 2226.2 (556.7) | 2615.9 (647.8) | <0.001 | 1314.3 (374.9) | 1633.8 (400.7) | 1867.6 (456.6) | 2243.3 (571.2) | <0.001 |

Data are expressed as numbers (percentage) or mean (SD) or median (IQR: 25%, 75%) unless otherwise indicated.

rJDI12, 12-component revised Japanese Diet Index; BMI, body mass index; TMIG, Tokyo Metropolitan Institute of Gerontology Index of Competence.

**Supplemental table S2.** Characteristics of sex discrimination in the aMed score quartile range

| Characteristics                        | Male       |            |            |            |          | Female     |            |            |            |          |
|----------------------------------------|------------|------------|------------|------------|----------|------------|------------|------------|------------|----------|
|                                        | Q1         | Q2         | Q3         | Q4         | <i>P</i> | Q1         | Q2         | Q3         | Q4         | <i>P</i> |
| <b>Range of scores</b>                 | 0–3        | 4          | 5          | 6–8        |          | 0–3        | 4          | 5          | 6–8        |          |
| <b>Participants, n</b>                 | 1,151      | 694        | 583        | 370        |          | 1,555      | 744        | 620        | 314        |          |
| <b>Age, years</b>                      | 61.7 (6.9) | 63.4 (7.0) | 63.6 (6.9) | 64.3 (6.6) | <0.001   | 61.6 (7.1) | 63.5 (6.9) | 63.7 (6.7) | 65.3 (6.5) | <0.001   |
| <b>BMI, kg/m2</b>                      | 23.3 (3.0) | 23.6 (2.8) | 23.7 (3.0) | 23.4 (2.7) | 0.073    | 22.8 (3.3) | 22.8 (3.3) | 22.8 (3.2) | 23.1 (3.1) | 0.498    |
| <b>Cerebrovascular diseases, n (%)</b> |            |            |            |            | 0.153    |            |            |            |            | 0.141    |
| - Yes                                  | 40 (3.5)   | 23 (3.3)   | 27 (4.6)   | 15 (4.1)   |          | 25 (1.6)   | 19 (2.6)   | 14 (2.3)   | 8 (2.5)    |          |
| - No                                   | 718 (62.4) | 452 (65.1) | 385 (66.0) | 254 (68.6) |          | 933 (60.0) | 461 (62.0) | 399 (64.4) | 204 (65.0) |          |
| - Missing                              | 393 (34.1) | 219 (31.6) | 171 (29.3) | 101 (27.3) |          | 597 (38.4) | 264 (35.5) | 207 (33.4) | 102 (32.5) |          |
| <b>Coronary heart diseases, n (%)</b>  |            |            |            |            | 0.003    |            |            |            |            | 0.068    |
| - Yes                                  | 98 (8.5)   | 88 (12.7)  | 80 (13.7)  | 50 (13.5)  |          | 114 (7.3)  | 59 (7.9)   | 54 (8.7)   | 36 (11.5)  |          |
| - No                                   | 660 (57.3) | 387 (55.8) | 332 (56.9) | 219 (59.2) |          | 844 (54.3) | 421 (56.6) | 359 (57.9) | 176 (56.1) |          |
| - Missing                              | 393 (34.1) | 219 (31.6) | 171 (29.3) | 101 (27.3) |          | 597 (38.4) | 264 (35.5) | 207 (33.4) | 102 (32.5) |          |
| <b>Diabetes, n (%)</b>                 |            |            |            |            | 0.014    |            |            |            |            | 0.157    |
| - Yes                                  | 123 (10.7) | 104 (15.0) | 82 (14.1)  | 59 (15.9)  |          | 98 (6.3)   | 59 (7.9)   | 45 (7.3)   | 20 (6.4)   |          |
| - No                                   | 635 (55.2) | 371 (53.5) | 330 (56.6) | 210 (56.8) |          | 860 (55.3) | 422 (56.7) | 368 (59.4) | 192 (61.1) |          |
| - Missing                              | 393 (34.1) | 219 (31.6) | 171 (29.3) | 101 (27.3) |          | 597 (38.4) | 263 (35.3) | 207 (33.4) | 102 (32.5) |          |
| <b>Cancer, n (%)</b>                   |            |            |            |            | 0.169    |            |            |            |            | 0.036    |
| - Yes                                  | 47 (4.1)   | 27 (3.9)   | 28 (4.8)   | 20 (5.4)   |          | 75 (4.8)   | 26 (3.5)   | 38 (6.1)   | 12 (3.8)   |          |
| - No                                   | 711 (61.8) | 448 (64.6) | 384 (65.9) | 249 (67.3) |          | 883 (56.8) | 454 (61.0) | 375 (60.5) | 200 (63.7) |          |

|                                   |                |                |                |                |        |                |                |                |                |        |
|-----------------------------------|----------------|----------------|----------------|----------------|--------|----------------|----------------|----------------|----------------|--------|
| - Missing                         | 393 (34.1)     | 219 (31.6)     | 171 (29.3)     | 101 (27.3)     |        | 597 (38.4)     | 264 (35.5)     | 207 (33.4)     | 102 (32.5)     |        |
| <b>Smoking status, n (%)</b>      |                |                |                |                | <0.001 |                |                |                |                | <0.001 |
| - Current                         | 432 (37.5)     | 213 (30.7)     | 163 (28.0)     | 90 (24.3)      |        | 165 (10.6)     | 69 (9.3)       | 54 (8.7)       | 12 (3.8)       |        |
| - Former                          | 484 (42.1)     | 308 (44.4)     | 268 (46.0)     | 179 (48.4)     |        | 136 (8.7)      | 52 (7.0)       | 31 (5.0)       | 16 (5.1)       |        |
| - Never                           | 208 (18.1)     | 156 (22.5)     | 137 (23.5)     | 94 (25.4)      |        | 1,214 (78.1)   | 600 (80.6)     | 525 (84.7)     | 273 (86.9)     |        |
| - Missing                         | 27 (2.3)       | 17 (2.4)       | 15 (2.6)       | 7 (1.9)        |        | 40 (2.6)       | 23 (3.1)       | 10 (1.6)       | 13 (4.1)       |        |
| <b>Alcohol consumption, n (%)</b> |                |                |                |                | <0.001 |                |                |                |                | 0.433  |
| - Every day                       | 430 (37.4)     | 263 (37.9)     | 198 (34.0)     | 142 (38.4)     |        | 128 (8.2)      | 68 (9.1)       | 40 (6.5)       | 27 (8.6)       |        |
| - Sometimes                       | 389 (33.8)     | 269 (38.8)     | 244 (41.9)     | 160 (43.2)     |        | 502 (32.3)     | 220 (29.6)     | 205 (33.1)     | 102 (32.5)     |        |
| - Never                           | 313 (27.2)     | 147 (21.2)     | 124 (21.3)     | 61 (16.5)      |        | 853 (54.9)     | 422 (56.7)     | 345 (55.6)     | 163 (51.9)     |        |
| - Missing                         | 19 (1.7)       | 15 (2.2)       | 17 (2.9)       | 7 (1.9)        |        | 72 (4.6)       | 34 (4.6)       | 30 (4.8)       | 22 (7.0)       |        |
| <b>Time spent walking, n (%)</b>  |                |                |                |                | 0.130  |                |                |                |                | 0.554  |
| - ≥1 h/d                          | 444 (38.6)     | 297 (42.8)     | 254 (43.6)     | 173 (46.8)     |        | 635 (40.8)     | 323 (43.4)     | 267 (43.1)     | 142 (45.2)     |        |
| - 0.5-1 h/d                       | 416 (36.1)     | 239 (34.4)     | 200 (34.3)     | 112 (30.3)     |        | 590 (37.9)     | 266 (35.8)     | 239 (38.5)     | 108 (34.4)     |        |
| - <0.5 h/d                        | 257 (22.3)     | 144 (20.7)     | 110 (18.9)     | 78 (21.1)      |        | 307 (19.7)     | 143 (19.2)     | 109 (17.6)     | 57 (18.2)      |        |
| - Missing                         | 34 (3.0)       | 14 (2.0)       | 19 (3.3)       | 7 (1.9)        |        | 23 (1.5)       | 12 (1.6)       | 5 (0.8)        | 7 (2.2)        |        |
| <b>TMIG-IC score, points</b>      | 5 (5–5)        | 5 (5–5)        | 5 (5–5)        | 5 (5–5)        | 0.035  | 5 (5–5)        | 5 (5–5)        | 5 (5–5)        | 5 (5–5)        | 0.064  |
| <b>Energy, kcal/d</b>             | 2042.5 (672.2) | 2058.9 (686.9) | 2065.1 (612.0) | 2125.5 (604.7) | 0.211  | 1702.6 (552.1) | 1754.4 (563.5) | 1820.9 (563.7) | 1821.1 (564.3) | <0.001 |

Data are expressed as numbers (percentage) or mean (SD) or median (IQR: 25%, 75%) unless otherwise indicated.

aMed, Alternate Mediterranean Diet; BMI, body mass index; rJDI12, 12-component revised Japanese Diet Index; TMIG, Tokyo Metropolitan Institute of Gerontology Index of Competence.

**Supplemental table S3.** Comparison of two dietary patterns and nutrient intakes

| Nutrient intakes   | Group of rJDI12 |               |               |               |          | Group of aMed |               |               |               |          |
|--------------------|-----------------|---------------|---------------|---------------|----------|---------------|---------------|---------------|---------------|----------|
|                    | Q1              | Q2            | Q3            | Q4            | <i>P</i> | Q1            | Q2            | Q3            | Q4            | <i>P</i> |
| Protein, g/d       | 61.3 (6.9)      | 62.3 (7.0)    | 63.4 (7.0)    | 64.5 (6.6)    | <0.001   | 68.1 (28.1)   | 74.4 (30.5)   | 77.9 (28.8)   | 81.8 (6.6)    | <0.001   |
| Fiber, g/d         | 8.4 (2.9)       | 11.9 (3.3)    | 15.5 (4.5)    | 19.9 (5.5)    | <0.001   | 11.7 (5.0)    | 14.2 (5.9)    | 15.7 (5.8)    | 16.8 (6.1)    | <0.001   |
| Vitamin A, µgRAE/d | 513 (468)       | 685 (389)     | 915 (604)     | 1152 (702)    | <0.001   | 701 (537)     | 834 (617)     | 904 (645)     | 952 (615)     | <0.001   |
| Vitamin C, mg/d    | 78 (39)         | 116 (47)      | 155 (57)      | 203 (67)      | <0.001   | 111 (61)      | 144 (70)      | 158 (68)      | 172 (70)      | <0.001   |
| Vitamin E, mg/d    | 5.43 (2.03)     | 7.30 (2.29)   | 9.21 (3.00)   | 11.7 (3.66)   | <0.001   | 7.27 (3.18)   | 8.52 (3.59)   | 9.29 (3.61)   | 9.87 (3.70)   | <0.001   |
| Calcium, mg/d      | 378 (169)       | 524 (181)     | 678 (232)     | 872 (282)     | <0.001   | 541 (258)     | 619 (290)     | 657 (279)     | 710 (297)     | <0.001   |
| Iron, mg/d         | 5.6 (1.9)       | 7.7 (1.9)     | 9.7 (2.6)     | 12.3 (3.3)    | <0.001   | 7.7 (3.2)     | 9.0 (3.5)     | 9.7 (3.4)     | 10.2 (3.5)    | <0.001   |
| Potassium, mg/d    | 1,770 (594)     | 2,438 (653)   | 3,139 (875)   | 3,993 (1,066) | <0.001   | 2,462 (1020)  | 2,889 (1172)  | 3,097 (1117)  | 3,290 (1,155) | <0.001   |
| Magnesium, mg/d    | 183 (56)        | 248 (58)      | 313 (79)      | 396 (100)     | <0.001   | 249 (96)      | 288 (107)     | 310 (104)     | 334 (110)     | <0.001   |
| Saturated fat, g/d | 10.2 (4.6)      | 12.5 (4.8)    | 14.6 (5.5)    | 17.1 (6.3)    | <0.001   | 14.0 (6.2)    | 13.3 (6.0)    | 12.9 (5.2)    | 12.3 (5.0)    | <0.001   |
| Sodium, mg/d       | 3,449 (1,001)   | 4,318 (1,045) | 5,111 (1,225) | 6,192 (1,561) | <0.001   | 4,322 (1,440) | 4,793 (1,560) | 5,077 (1,542) | 5,378 (1,617) | <0.001   |
| Sugar, g/d         | 10.3 (8.6)      | 12.0 (9.5)    | 12.8 (9.5)    | 15.2 (11.1)   | <0.001   | 14.2 (10.5)   | 11.9 (9.6)    | 10.8 (8.4)    | 9.4 (7.9)     | <0.001   |

Data are expressed as mean (SD).

rJDI12, 12-component revised Japanese Diet Index; aMed, Alternate Mediterranean Diet

**Supplemental table S4.** Relationship between the constituent nutrients of rJDI12 and muscle weakness

|               | Group of rJDI12   |                     |                     |                     | <i>P</i> for trend |
|---------------|-------------------|---------------------|---------------------|---------------------|--------------------|
|               | Q1                | Q2                  | Q3                  | Q4                  |                    |
| Protein       | 1.000 (reference) | 0.879 (0.684–1.130) | 0.805 (0.614–1.055) | 0.738 (0.533–1.023) | 0.058              |
| Fiber         | 1.000 (reference) | 0.907 (0.703–1.170) | 0.861 (0.644–1.150) | 0.820 (0.570–1.178) | 0.265              |
| Vitamin A     | 1.000 (reference) | 0.849 (0.664–1.085) | 0.740 (0.576–0.951) | 0.647 (0.489–0.855) | 0.001              |
| Vitamin C     | 1.000 (reference) | 0.880 (0.684–1.133) | 0.807 (0.612–1.064) | 0.740 (0.529–1.034) | 0.067              |
| Vitamin E     | 1.000 (reference) | 0.860 (0.669–1.105) | 0.767 (0.584–1.009) | 0.683 (0.490–0.952) | 0.019              |
| Calcium       | 1.000 (reference) | 0.855 (0.666–1.098) | 0.758 (0.577–0.995) | 0.669 (0.481–0.932) | 0.014              |
| Iron          | 1.000 (reference) | 0.884 (0.685–1.142) | 0.815 (0.611–1.087) | 0.752 (0.524–1.078) | 0.108              |
| Potassium     | 1.000 (reference) | 0.910 (0.705–1.174) | 0.867 (0.650–1.157) | 0.830 (0.579–1.190) | 0.292              |
| Magnesium     | 1.000 (reference) | 0.916 (0.708–1.184) | 0.876 (0.652–1.175) | 0.844 (0.581–1.226) | 0.353              |
| Saturated fat | 1.000 (reference) | 0.863 (0.674–1.105) | 0.775 (0.600–1.000) | 0.694 (0.519–0.928) | 0.010              |
| Sodium        | 1.000 (reference) | 0.863 (0.670–1.112) | 0.775 (0.588–1.021) | 0.694 (0.494–0.974) | 0.028              |
| Sugar         | 1.000 (reference) | 0.866 (0.678–1.106) | 0.779 (0.610–0.995) | 0.700 (0.535–0.915) | 0.006              |

Odds ratios adjusted for age (50–54, 55–59, 60–64, 65–69, or ≥70 y), sex, BMI (<18.5, 18.5–25, ≥25 kg/m<sup>2</sup>, or missing), IADL score (TMIG-IC score), time spent walking (≥1, 0.5–1, <0.5 h/d, or missing), alcohol consumption (every day, sometimes, never, or missing), smoking status (current, former, never, or missing), history of diseases (cerebrovascular diseases, coronary heart diseases, diabetes, cancer [yes, no, or missing for each term]).

rJDI 12, 12-component revised Japanese Diet Index

**Supplemental table S5.** Relationship between the constituent nutrients of aMed and muscle weakness

|               | Group of aMed     |                     |                     |                     | <i>P</i> for trend |
|---------------|-------------------|---------------------|---------------------|---------------------|--------------------|
|               | Q1                | Q2                  | Q3                  | Q4                  |                    |
| Protein       | 1.000 (reference) | 0.881 (0.701–1.105) | 0.751 (0.583–0.966) | 1.059 (0.799–1.403) | 0.436              |
| Fiber         | 1.000 (reference) | 0.909 (0.722–1.144) | 0.795 (0.614–1.030) | 1.131 (0.846–1.511) | 0.852              |
| Vitamin A     | 1.000 (reference) | 0.857 (0.683–1.076) | 0.723 (0.561–0.930) | 1.005 (0.759–1.331) | 0.238              |
| Vitamin C     | 1.000 (reference) | 0.897 (0.713–1.129) | 0.776 (0.599–1.005) | 1.100 (0.823–1.470) | 0.681              |
| Vitamin E     | 1.000 (reference) | 0.883 (0.702–1.110) | 0.758 (0.586–0.979) | 1.066 (0.800–1.420) | 0.501              |
| Calcium       | 1.000 (reference) | 0.876 (0.698–1.101) | 0.747 (0.580–0.963) | 1.053 (0.793–1.397) | 0.412              |
| Iron          | 1.000 (reference) | 0.895 (0.711–1.125) | 0.771 (0.597–0.996) | 1.092 (0.820–1.454) | 0.625              |
| Potassium     | 1.000 (reference) | 0.903 (0.718–1.135) | 0.783 (0.606–1.011) | 1.113 (0.836–1.482) | 0.735              |
| Magnesium     | 1.000 (reference) | 0.904 (0.719–1.136) | 0.785 (0.608–1.014) | 1.124 (0.843–1.499) | 0.775              |
| Saturated fat | 1.000 (reference) | 0.860 (0.686–1.079) | 0.724 (0.563–0.932) | 1.005 (0.759–1.330) | 0.235              |
| Sodium        | 1.000 (reference) | 0.881 (0.701–1.107) | 0.754 (0.585–0.972) | 1.063 (0.800–1.413) | 0.469              |
| Sugar         | 1.000 (reference) | 0.859 (0.685–1.079) | 0.726 (0.564–0.934) | 1.008 (0.760–1.336) | 0.250              |

Odds ratios adjusted for age (50–54, 55–59, 60–64, 65–69, or ≥70 y), sex, BMI (<18.5, 18.5–25, ≥25 kg/m<sup>2</sup>, or missing), IADL score (TMIG-IC score), time spent walking (≥1, 0.5–1, <0.5 h/d, or missing), alcohol consumption (every day, sometimes, never, or missing), smoking status (current, former, never, or missing), history of diseases (cerebrovascular diseases, coronary heart diseases, diabetes, cancer [yes, no, or missing for each term]).

aMed, Alternate Mediterranean Diet

**Supplemental table S6.** Relationship between the combination of adherence to two dietary patterns and muscle weakness

|                                | Adjusted odds ratio | 95% confidence interval | <i>P</i> |
|--------------------------------|---------------------|-------------------------|----------|
| Model 1                        |                     |                         |          |
| Both low scores                | 1.000 (reference)   |                         |          |
| High rJDI12 and low aMed score | 0.783               | 0.625–0.982             | 0.034    |
| Low rJDI12 and high aMed score | 0.898               | 0.650–1.242             | 0.516    |
| Both high scores               | 0.703               | 0.507–0.974             | 0.021    |
| Model 2                        |                     |                         |          |
| Low rJDI12 and high aMed score | 1.000 (reference)   |                         |          |
| High rJDI12 and low aMed score | 0.872               | 0.617–1.232             | 0.437    |
| Both high scores               | 0.845               | 0.595–1.199             | 0.345    |
| Both low scores                | 1.113               | 0.805–1.540             | 0.516    |

Adjusted for age (50–54, 55–59, 60–64, 65–69, or ≥70 y) and sex, BMI (<18.5, 18.5–25, ≥25 kg/m2, or missing), IADL score (TMIG-IC score), time spent walking (≥1, 0.5-1, <0.5 h/d, or missing), alcohol consumption (every day, sometimes, never, or missing), smoking status (current, former, never, or missing), history of diseases (cerebrovascular disease, coronary heart disease, diabetes, cancer [yes, no, or missing for each term]).

rJDI12, 12-component revised Japanese Diet Index; aMed, Alternate Mediterranean Diet.
